# Supplementary material for: A pyrene-induced PET-based chemosensor for biologically important Zn(ii) ions: application in test strips and live cell imaging studies
Source: Royal Society of Chemistry journal article supplement (doi:10.1039/d4ay00252k), 2024-01-01
Supplement: d4ay00252k1.pdf [file d4ay00252k1.pdf]

## **Electronic Supporting Information**

### **A Pyrene Induced PET Based Chemosensor for Biologically Important Zn(II) ion: Application for Test Strips and Live Cell Imaging Studies**

Chethanakumar<sup>a</sup>, Mahantesh B. Budri<sup>a</sup>, Kalagouda B. Gudasi<sup>a\*</sup>, Ramesh S. Vadavi<sup>a\*</sup>,  
Mallikarjun K. Patil<sup>b</sup>, Vijay M. Kumbar<sup>c</sup>, Sanjeev R. Inamdar<sup>b</sup>

<sup>a</sup> *Department of Chemistry, Karnatak University, Dharwad 580003, India*

<sup>b</sup> *Laser Spectroscopy (DRDO/KU) Programme, Department of Physics, Karnatak University,  
Dharwad, 580003, India*

<sup>c</sup> *Dr. Prabhakar Kore Basic Science Research Centre, KLE Academy of Higher Education and  
Research (KLE University), Belagavi, 590010, India*

\*Corresponding authors e-mail id: [drkbgudasi@kud.ac.in](mailto:drkbgudasi@kud.ac.in) (kbgudasi); [rsvadavi@gmail.com](mailto:rsvadavi@gmail.com)  
(rsvadavi)

| <b>Sl. No.</b> | <b>Contents</b>                                   | <b>Figure</b> |
|----------------|---------------------------------------------------|---------------|
| 01             | <sup>1</sup> H-NMR and <sup>13</sup> C-NMR of DTH | S1 & S2       |
| 02             | <sup>1</sup> H-NMR and <sup>13</sup> C-NMR of DTQ | S3 & S4       |
| 03             | ESI-MS Spectrometry of DTH                        | S5            |
| 04             | ESI-MS Spectrometry of DTQ                        | S6            |
| 05             | ESI-MS Spectrometry of DTQ + Zn(II)               | S7            |
| 06             | FT-IR Spectra of DTH                              | S8            |
| 07             | FT-IR Spectra of DTQ                              | S9            |
| 08             | FT-IR Spectra of DTQ + Zn(II)                     | S10           |
| 09             | MTT assay                                         | S11           |

|    |                                       |     |
|----|---------------------------------------|-----|
| 10 | Bar graph of competitive studies      | S12 |
| 11 | Job's plot                            | S13 |
| 12 | Graph of pH Studies                   | S14 |
| 13 | Graph of reversible nature of DTQ     | S15 |
| 14 | Merged images of cell imaging studies | S16 |

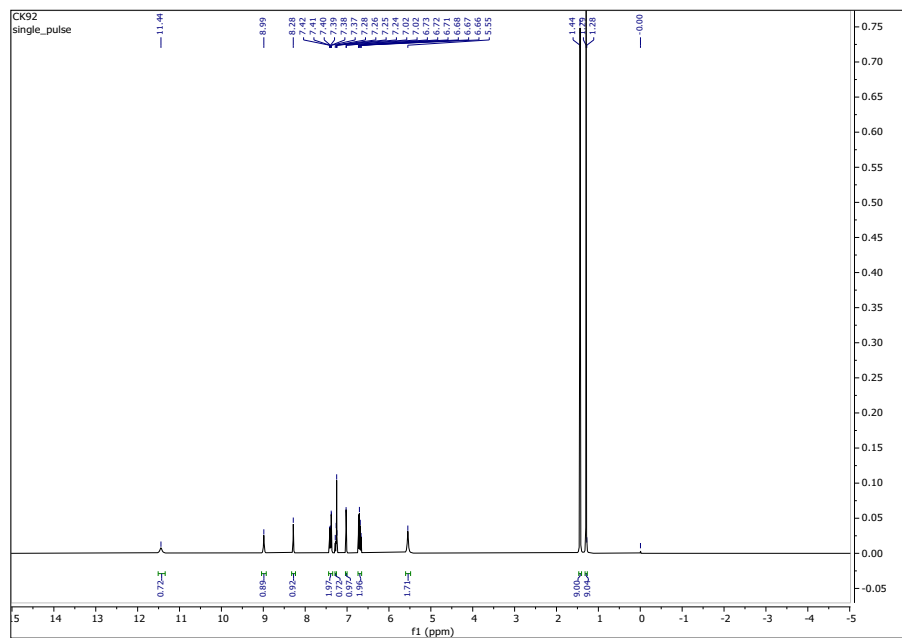

Fig. S1 <sup>1</sup>H-NMR spectra of DTH.

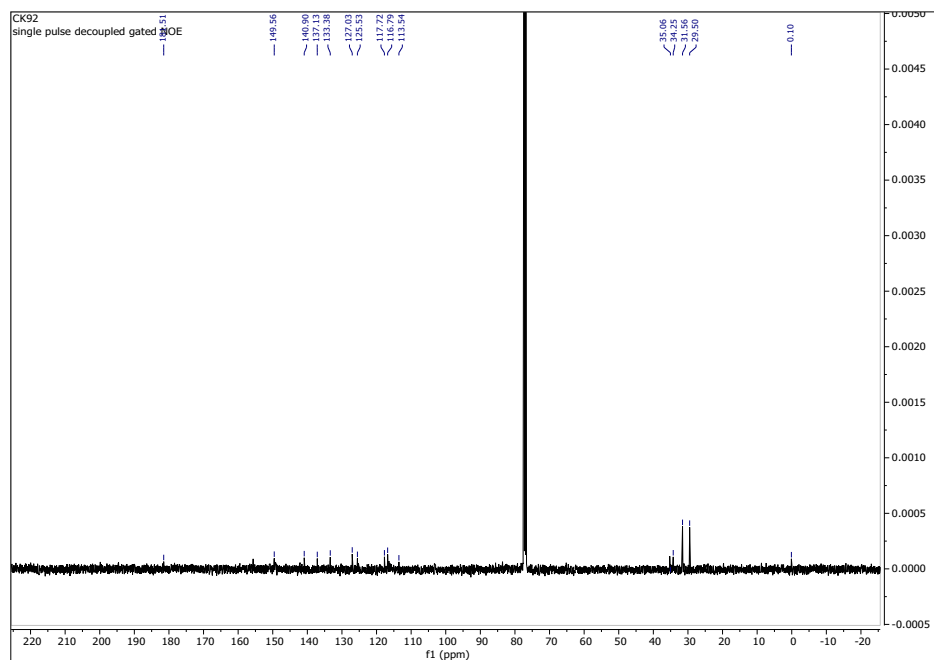

Fig. S2 <sup>13</sup>C-NMR spectra of DTH.

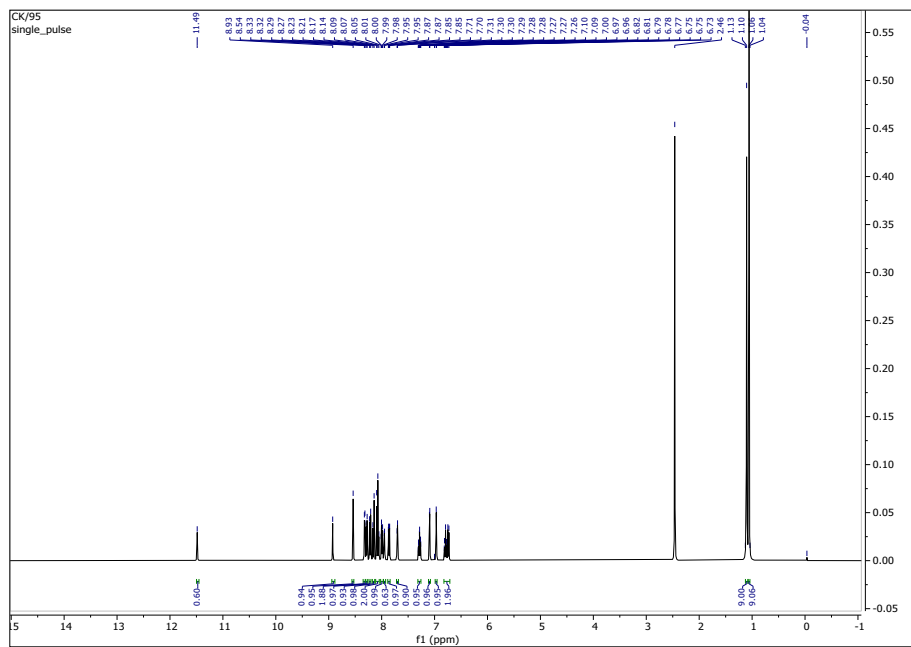

Fig. S3  $^1\text{H}$ -NMR spectra of DTQ.

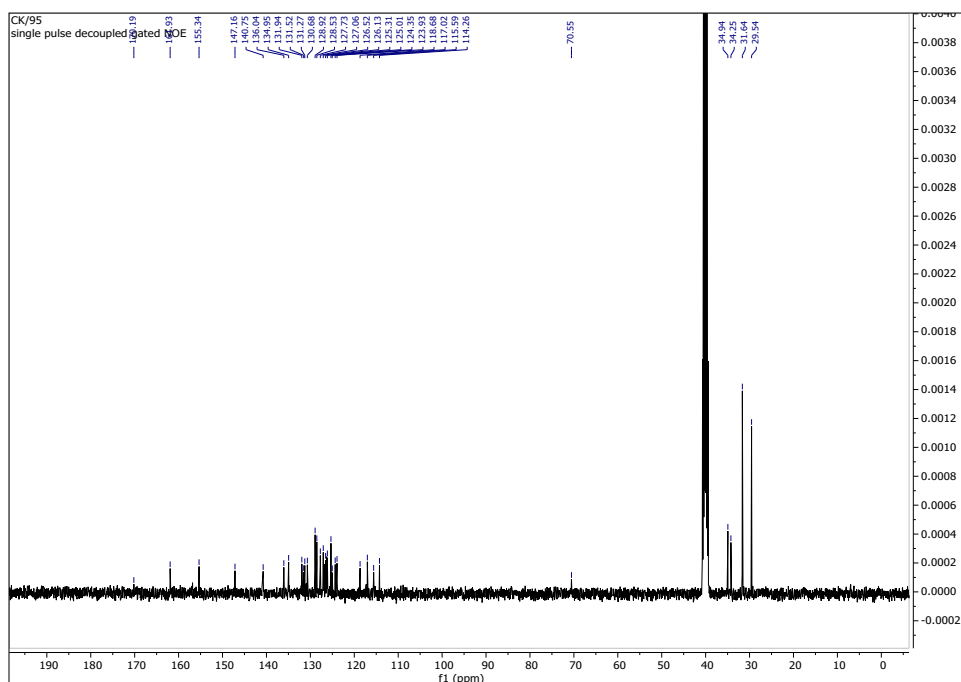

Fig. S4  $^{13}\text{C}$ -NMR spectra of DTQ.

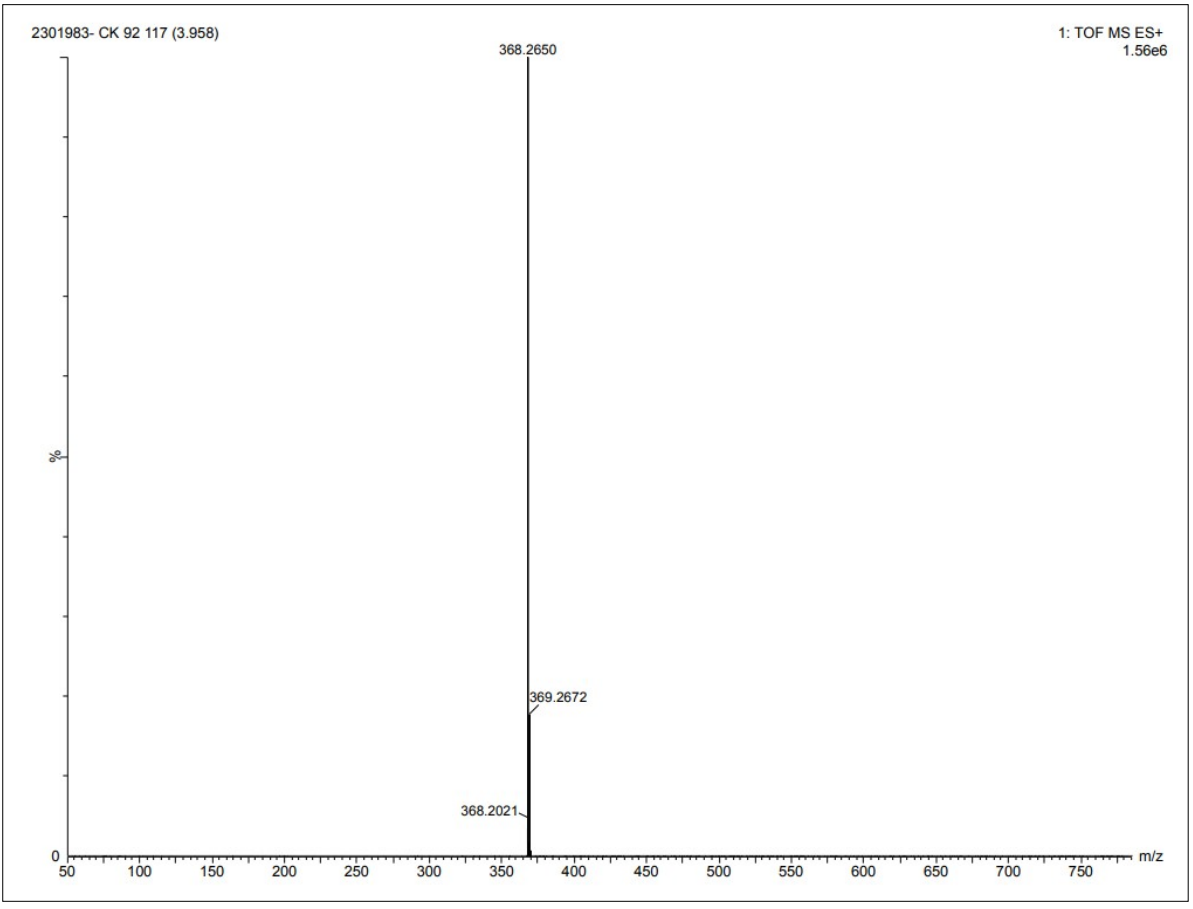

**Fig. S5** ESI-MS Spectrometry of DTH.

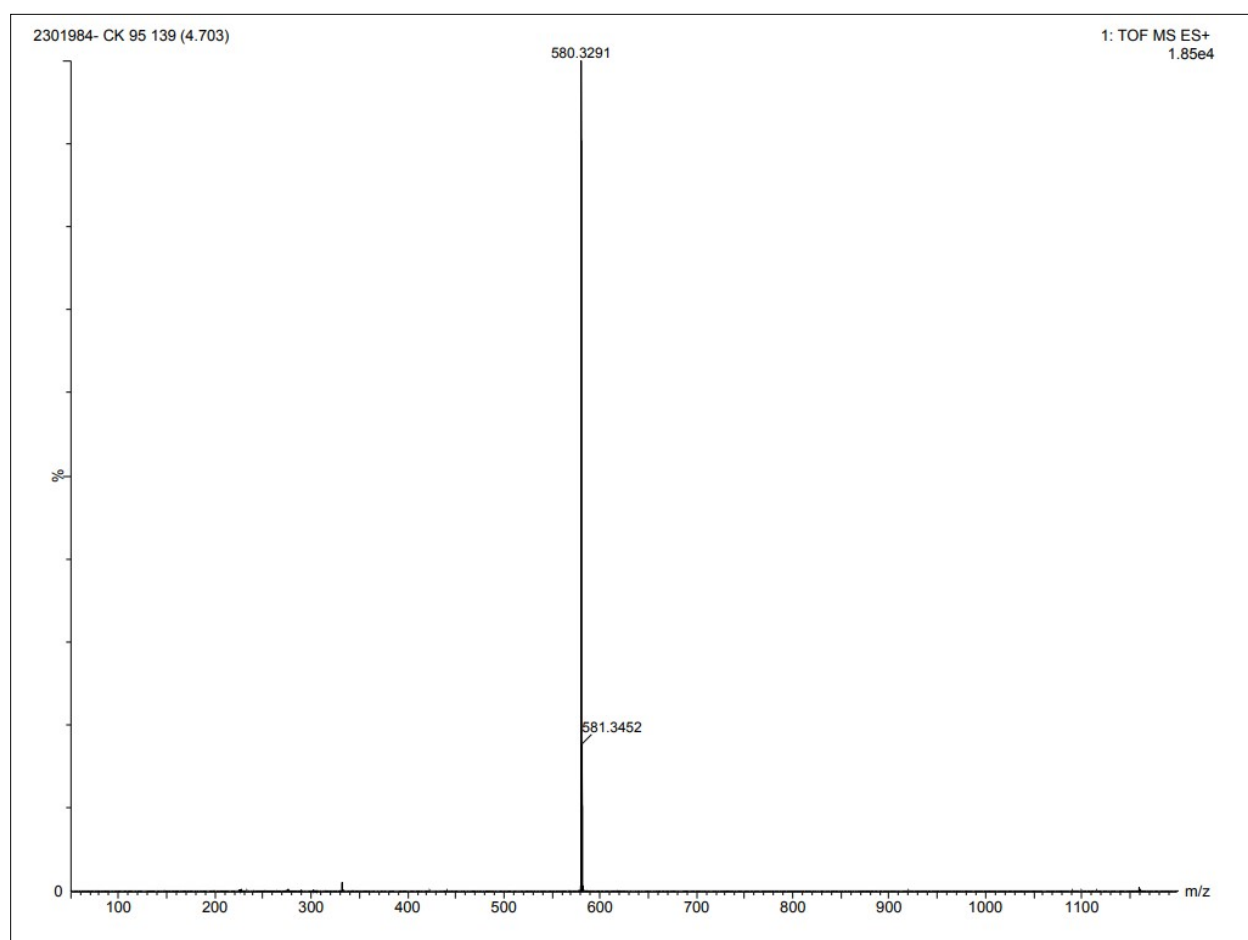

**Fig. S6** ESI-MS Spectrometry of DTQ.

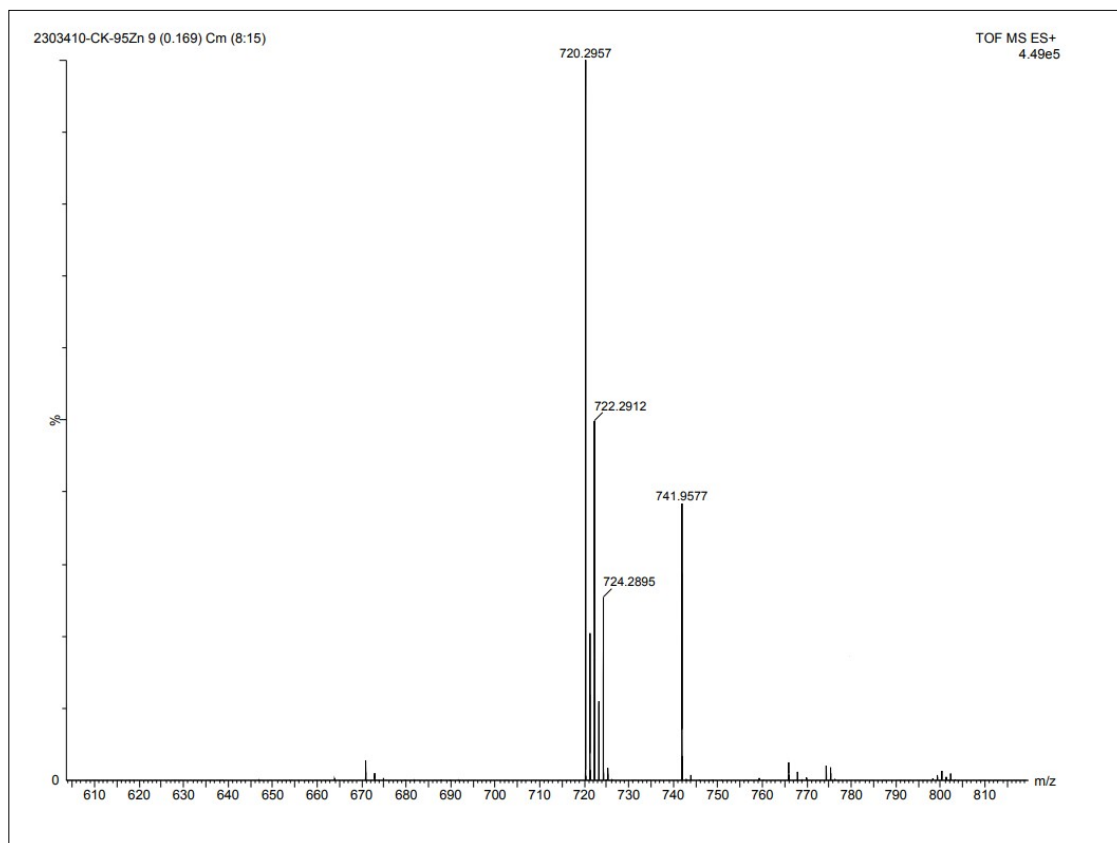

**Fig. S7** ESI-MS Spectrometry of DTQ + Zn(II).

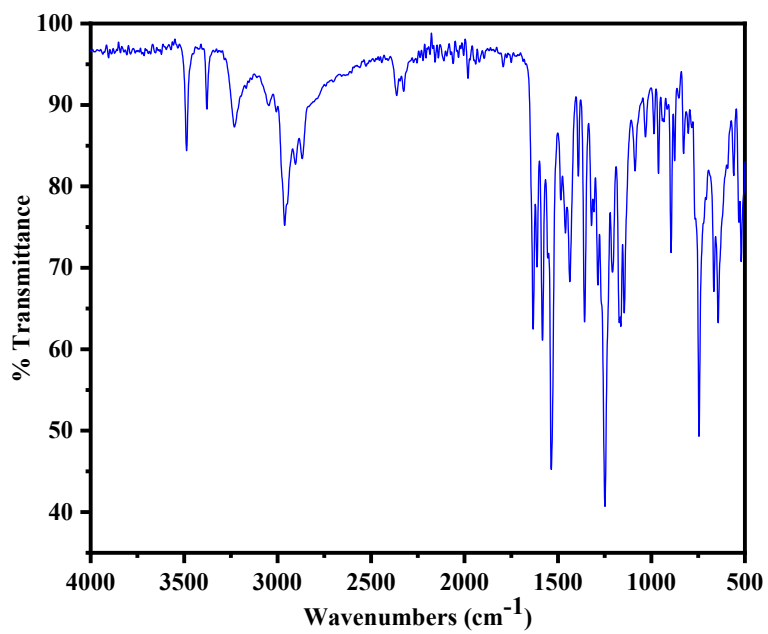

**Fig. S8** FT-IR Spectra of DTH.

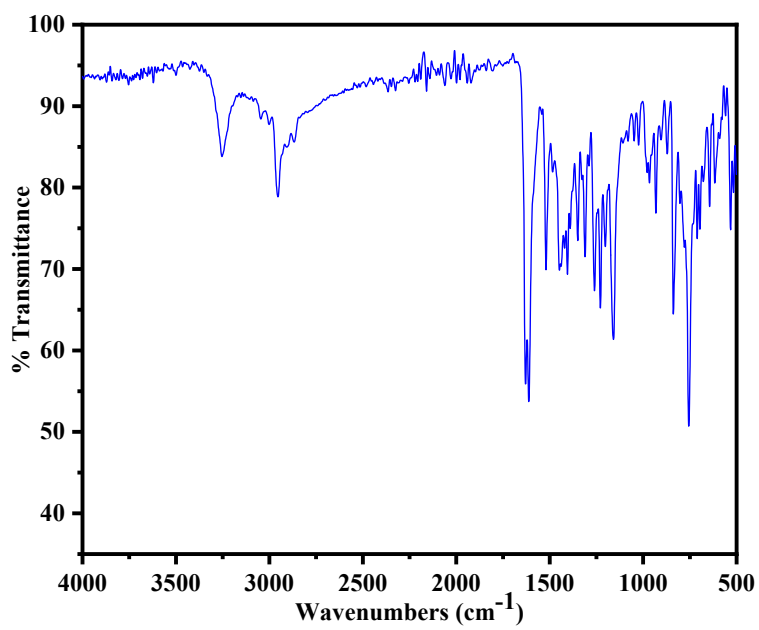



**Fig. S9** FT-IR Spectra of DTQ.

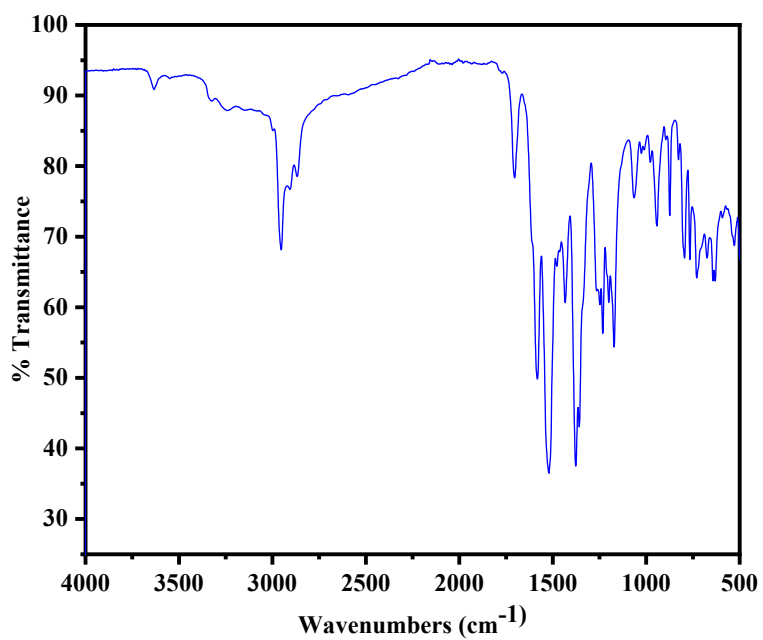

**Fig. S10** FT-IR Spectra of DTQ + Zn(II).

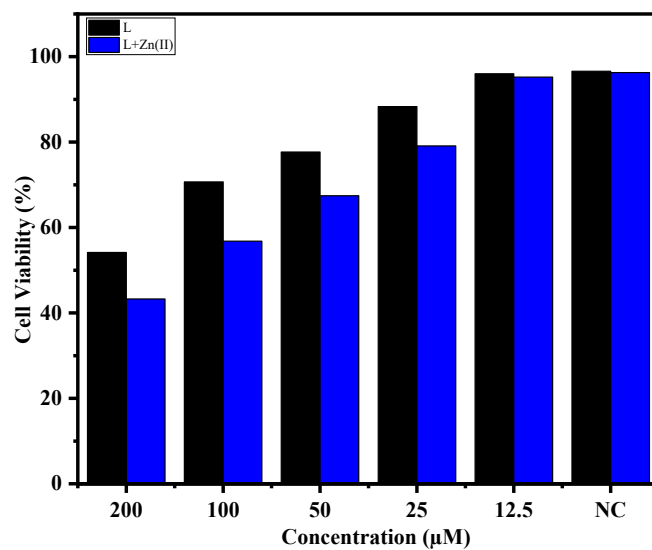

Fig. S11 MTT assay of L (DTQ) in presence and absence of Zn(II).

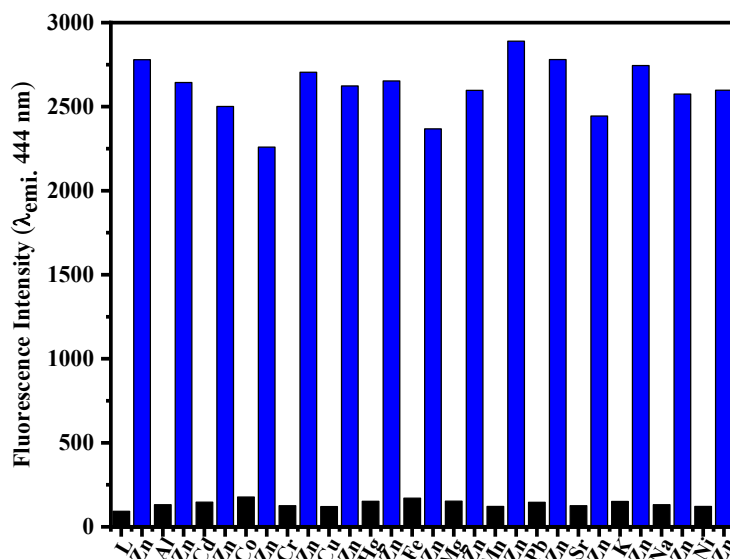

**Fig. S12** Fluorescence intensity of DTQ at 444 nm ( $\lambda_{ex.} = 370$  nm) with different competing metal ions in presence and absence of Zn(II) in aq. acetonitrile (1:1).

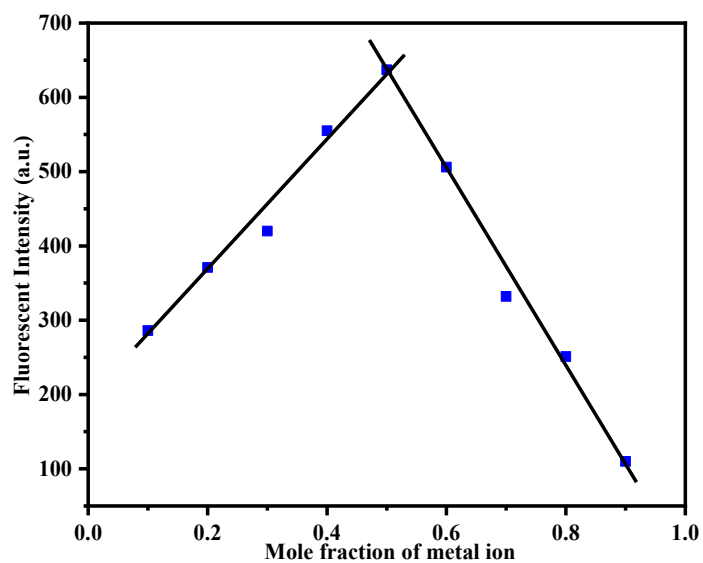

**Fig. S13** Job's plot displaying the 1:1 stoichiometry between DTQ and Zn(II). The mole ratio  $[Zn(II)]/\{[DTQ] + [Zn(II)]\}$  was demonstrated.

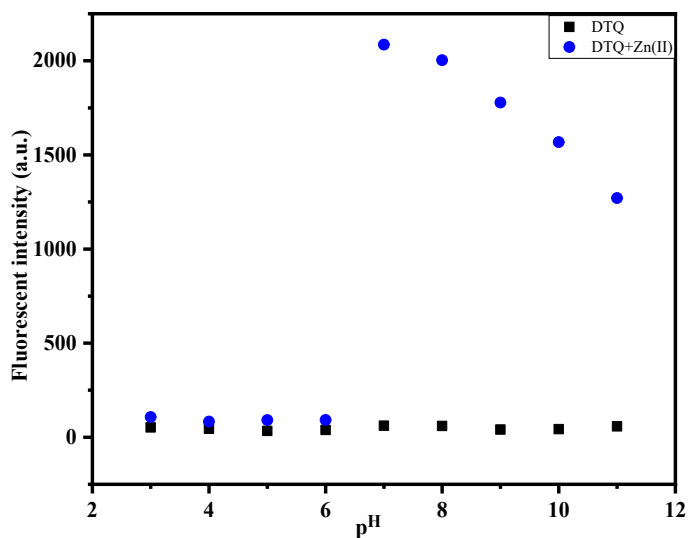

**Fig. S14** pH (3.0-11.0) graph for DTQ towards Zn(II) in PBS.

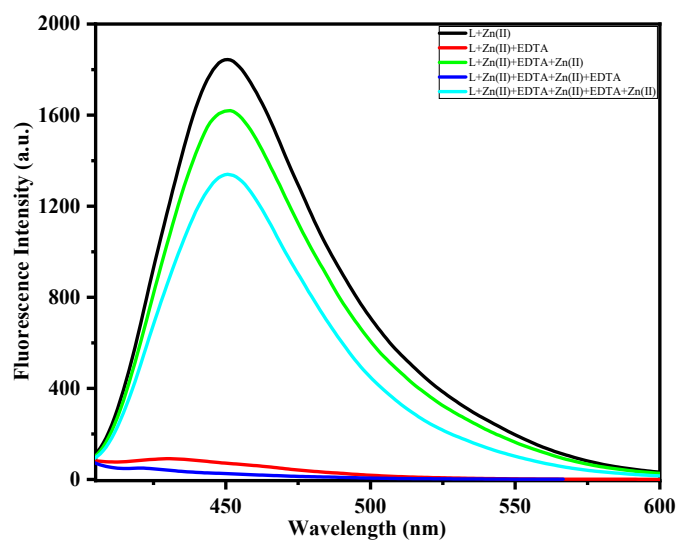

Fig. S15 Reversible investigations of DTQ with EDTA in aq. acetonitrile.

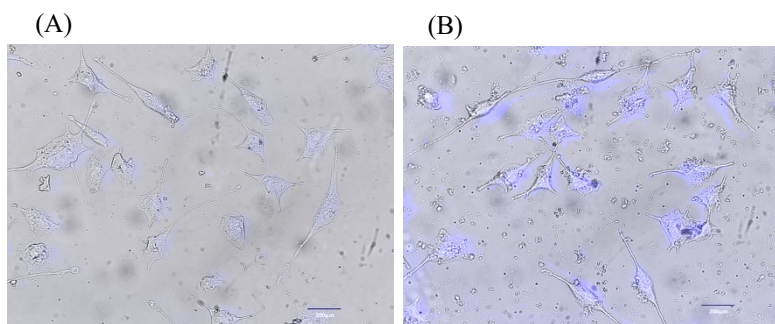

**Fig. S16** Merged images (A) Bright field, (B) fluorescence microscopy.

**Table 1** Comparison of sensor DTQ with previously reported probes for Zn<sup>2+</sup> recognition.

| Sl. No. | Sensor                                                                              | Detection Limit (M)   | Binding Constant (M <sup>-1</sup> ) | Application  | Reference |
|---------|-------------------------------------------------------------------------------------|-----------------------|-------------------------------------|--------------|-----------|
| 01      | 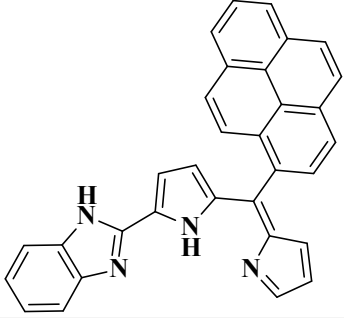  | $0.23 \times 10^{-6}$ | $6.12 \times 10^4$                  | -            | [34]      |
| 02      |  | $1.01 \times 10^{-6}$ | $1.08 \times 10^5$                  | Cell imaging | [35]      |
| 03      |  | $0.40 \times 10^{-6}$ | $1.0 \times 10^5$                   | Cell imaging | [25]      |

|    |                                                                                     |                       |                    |                      |      |
|----|-------------------------------------------------------------------------------------|-----------------------|--------------------|----------------------|------|
| 04 | 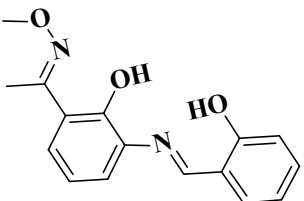   | $1.44 \times 10^{-7}$ | $2.24 \times 10^4$ | -                    | [36] |
| 05 |    | $1.47 \times 10^{-6}$ | $1.21 \times 10^5$ | Cell imaging         | [37] |
| 06 |    | $1.73 \times 10^{-7}$ | $2.0 \times 10^4$  | -                    | [38] |
| 07 |   | $1.1 \times 10^{-7}$  | -                  | Test Strips          | [39] |
| 08 |  | $8.82 \times 10^{-7}$ | $8.98 \times 10^4$ | -                    | [40] |
| 09 |  | $2.95 \times 10^{-8}$ | $1.46 \times 10^4$ | Cell imaging         | [41] |
| 10 |  | $0.14 \times 10^{-6}$ | $7.99 \times 10^4$ | Real sample analysis | [42] |

|    |                                                                                     |                       |                    |                                    |              |
|----|-------------------------------------------------------------------------------------|-----------------------|--------------------|------------------------------------|--------------|
| 11 | 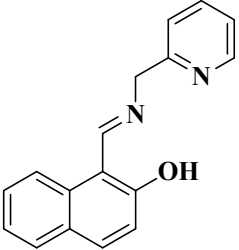   | $1.96 \times 10^{-6}$ | -                  | Molecular switches and test strips | [43]         |
| 12 |    | $7.5 \times 10^{-7}$  | $1.39 \times 10^5$ | Real sample analysis               | [44]         |
| 13 |    | $2.7 \times 10^{-7}$  | -                  | Cell imaging                       | [45]         |
| 14 |   | $3.2 \times 10^{-6}$  | $4.0 \times 10^4$  | Cell imaging                       | [46]         |
| 15 |  | $5.1 \times 10^{-9}$  | $3.0 \times 10^5$  | Cell imaging                       | [47]         |
| *  |  | $13.4 \times 10^{-9}$ | $1.47 \times 10^5$ | Cell imaging and test strips       | Present work |
